# Supplementary material for: The effect of quantum dot labeling on virus activity
Source: Royal Society of Chemistry journal article supplement (doi:10.1039/c5ay00176e), 2015-01-01
Supplement: c5ay00176e1.pdf [file c5ay00176e1.pdf]

**<Electronic Supplementary Information>**

**The Effect of Quantum Dot Labeling on Virus Activity**

Jie Wang, Xiaoxiao Huang, Rui Zhu, Yijuan Long and Huzhi Zheng\*

Key Laboratory of Luminescent and Real-Time Analytical Chemistry (Southwest University), Ministry of Education; School of Chemistry and Chemical Engineering, Southwest University, No. 2 Tiansheng Road, Chongqing, 400715, P. R. China.

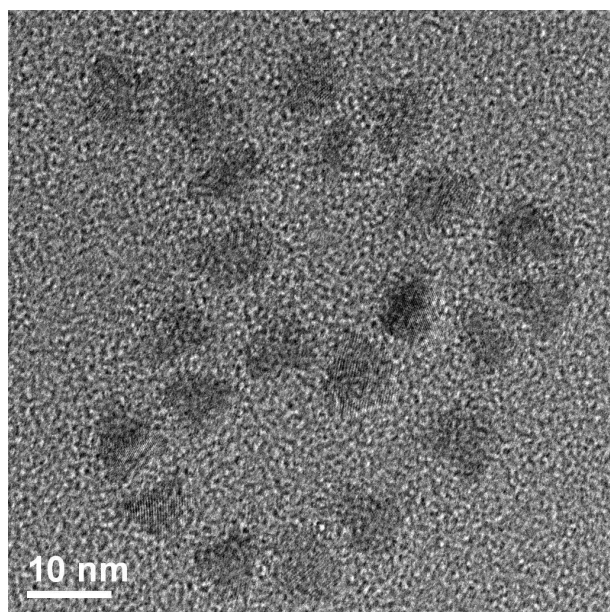

**Fig. S1** TEM of SA-QDs

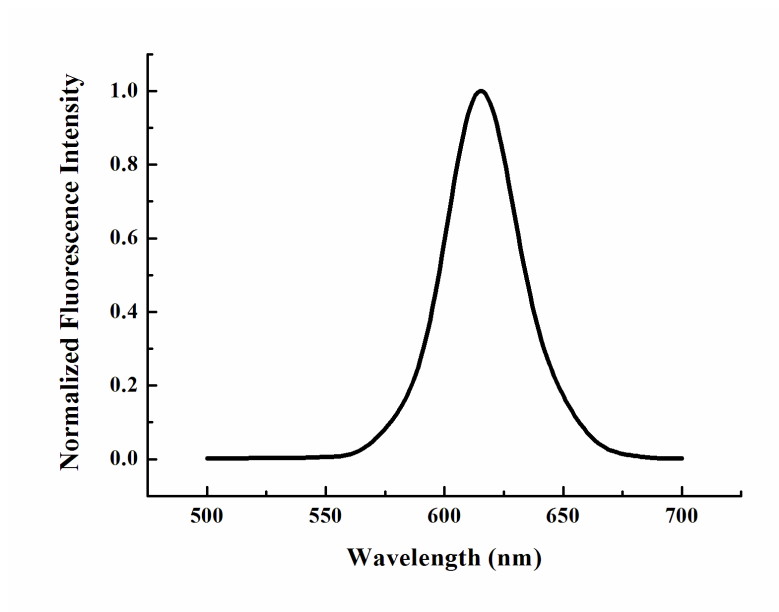

**Fig. S2** Fluorescence emission spectrum of SA-QDs

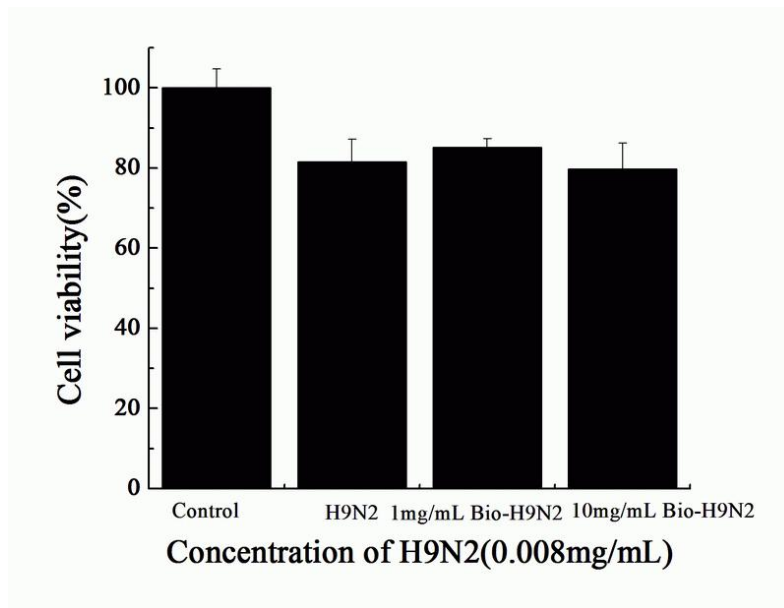

**Fig. S3** The cell viability of A549 cells incubated with H9N2 virus modified with different concentration of biotin after 24h; H9N2: native unmodified H9N2; Bio-H9N2: biotin modified H9N2.

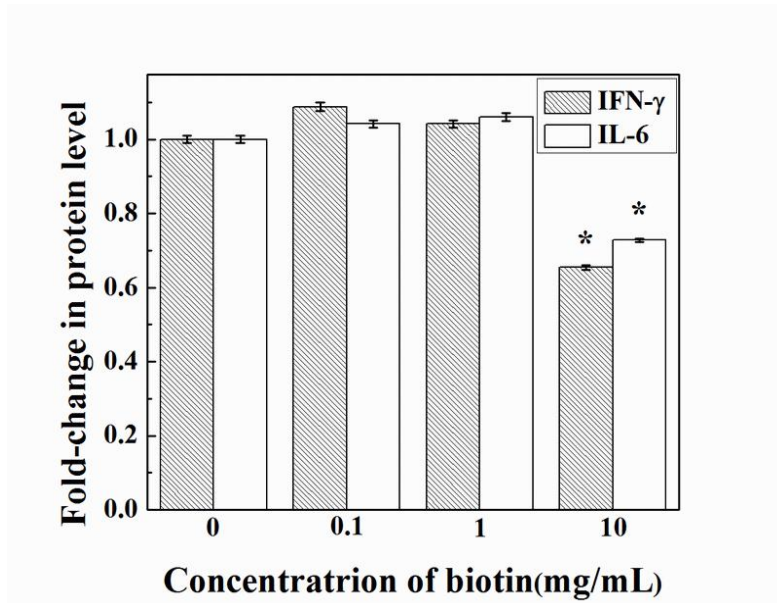

**Fig. S4** IFN- $\gamma$  and IL-6 secretion of A549 incubated with H9N2 virus modified with different concentration of biotin after 48h.

Concentration of H9N2: 0.008 mg/mL. Fold-change in protein level = cytokine secretion induced by modified H9N2: cytokine secretion induced by unmodified H9N2.

**Fig. S5** The cell viability of MDCK cells incubated with different concentration of H9N2 virus for 24 h (a) and 48 h (b). Asterisks denote a statistically significant difference in cell viability compared to native unmodified H9N2 (\*,  $P < 0.05$ ).

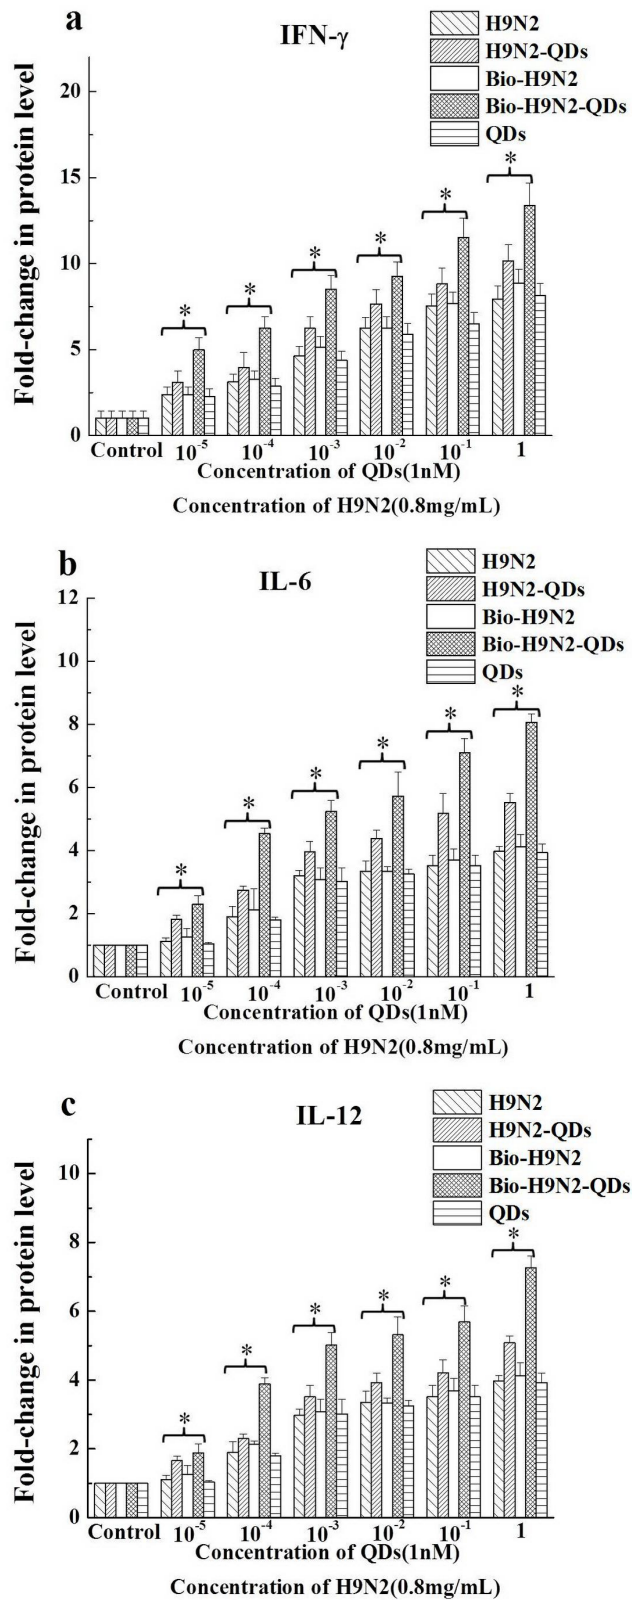

**Fig. S6** The cytokine secretion of RAW264.7 cells incubated with different concentration of virus after 24h. Asterisks denote a statistically significant difference in cell viability compared to native unmodified H9N2 (\*,  $P < 0.05$ ).

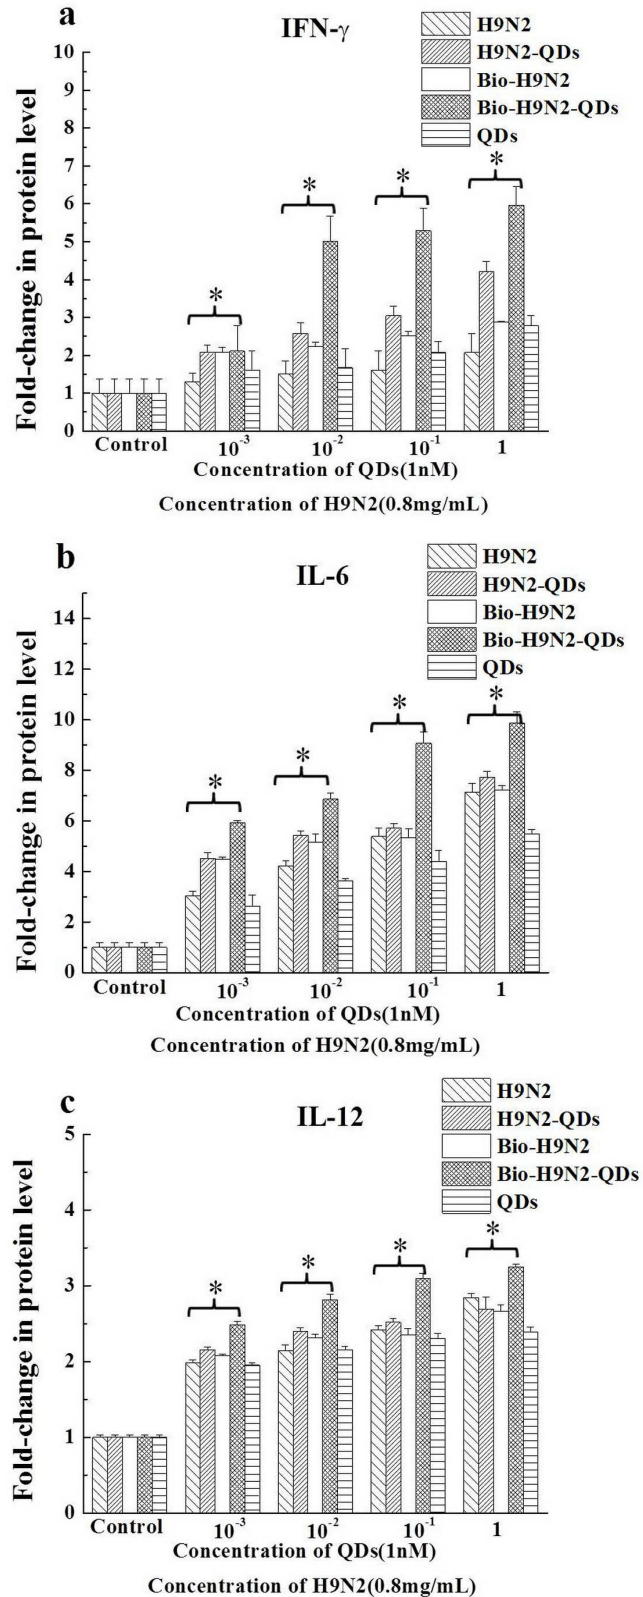

**Fig. S7** The cytokine secretion of A549 cells incubated with different concentration of virus after 48h. Asterisks denote a statistically significant difference in cell viability compared to native unmodified H9N2 (\*,  $P < 0.05$ ).



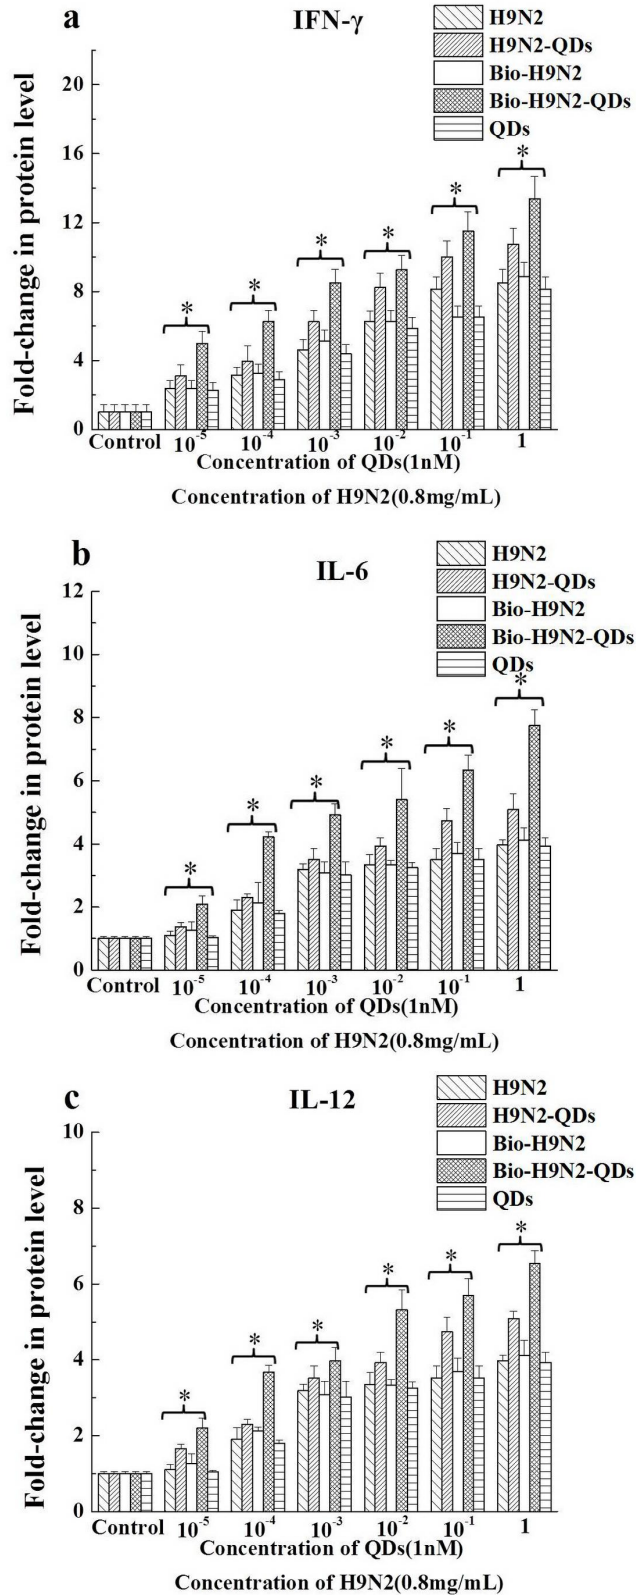

**Fig. S8** The cytokine secretion of RAW264.7 cells incubated with different concentration of virus after 48h. Asterisks denote a statistically significant difference in cell viability compared to native unmodified H9N2 (\*,  $P < 0.05$ ).

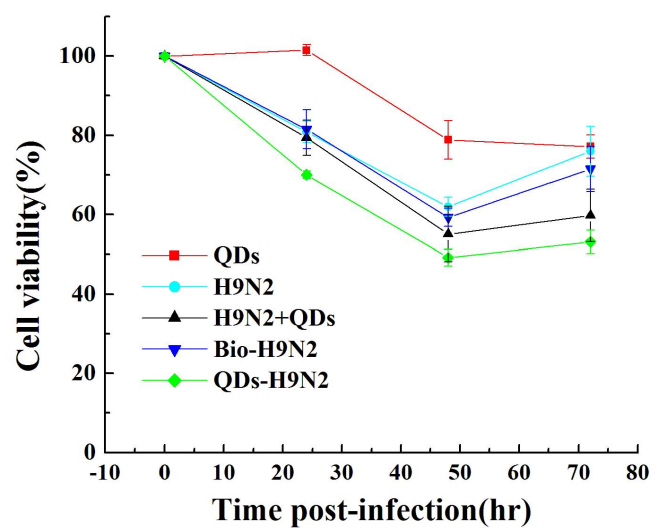

**Fig. S9** The cell viability of MDCK cells incubated with H9N2 virus for different time. Concentration of H9N2 was 0.08 mg/mL; concentration of QDs was 0.1 nM.

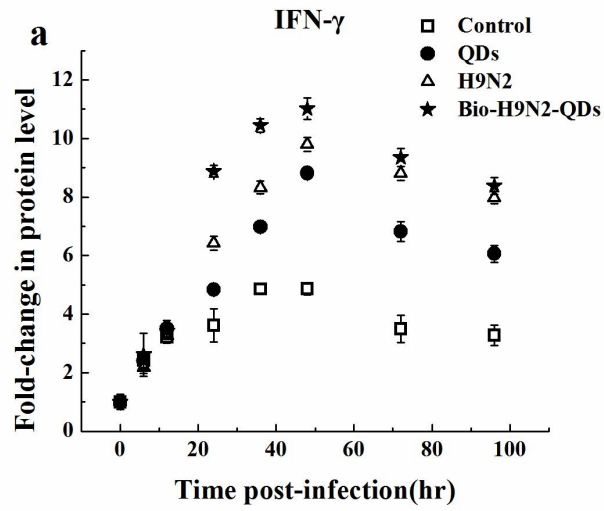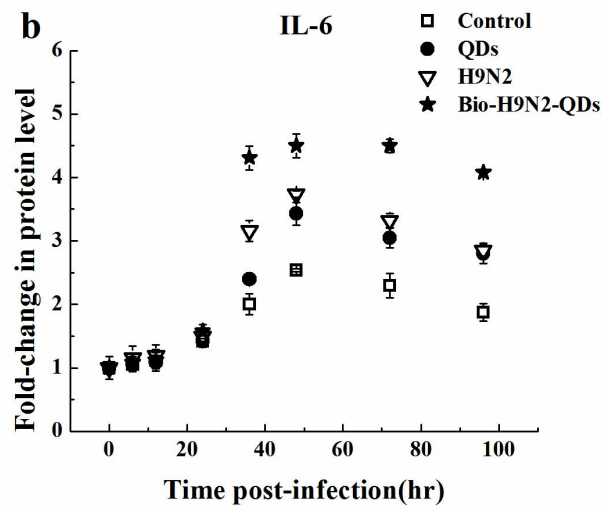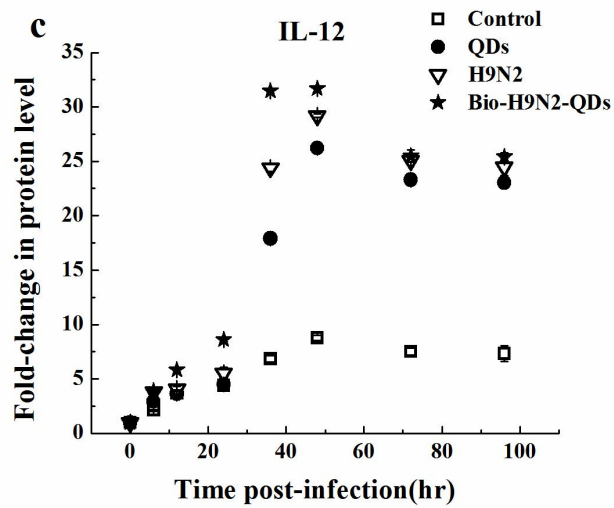

**Fig. S10** The cytokine secretion of A549 cells incubated with H9N2 virus for different time. Concentration of H9N2 was 0.08 mg/mL; concentration of QDs was 0.1 nM.

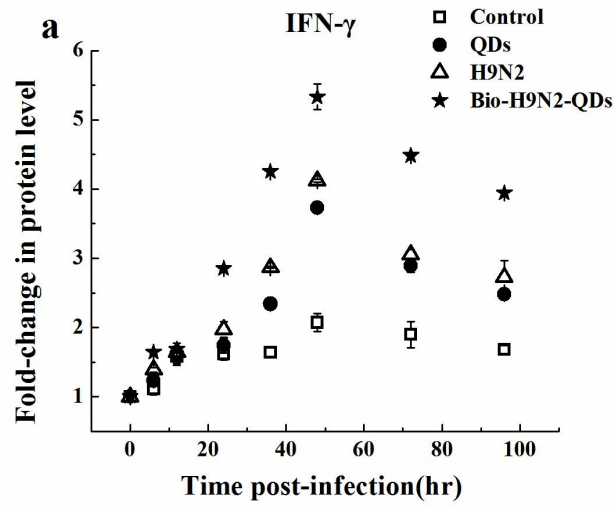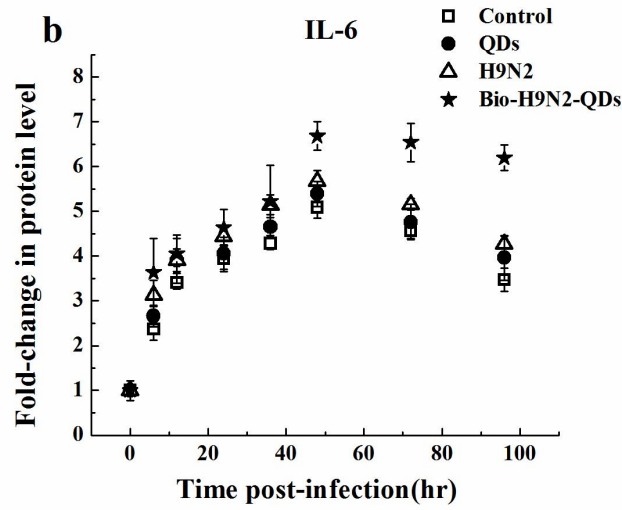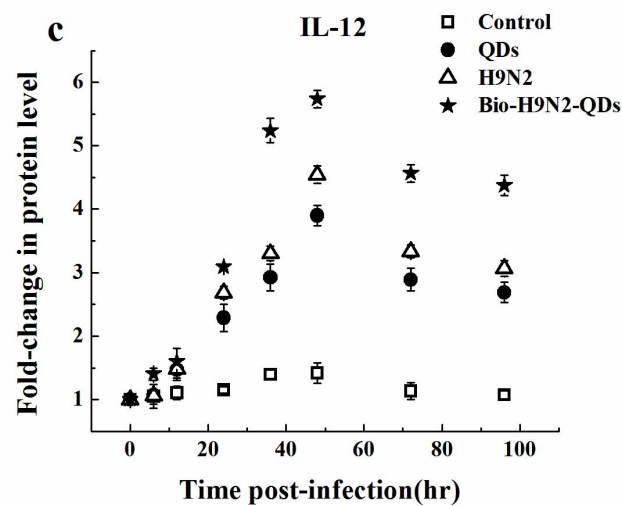

**Fig. S11** The cytokine secretion of RAW264.7 cells incubated with H9N2 virus for different time. Concentration of H9N2 was 0.08 mg/mL; concentration of QDs was

0.1 nM.
